# Supplementary material
Source: PubMed Central journal article supplement (PMC3697605)
Supplement: IAI.00259-13_zii999090216so1.pdf [file IAI.00259-13_zii999090216so1.pdf]

## SUPPLEMENTAL MATERIAL

**SUPPLEMENTAL TABLE 1** RFLP markers used in comparing the parental strains XL280p and JEC20a.

| Marker name | Chromosome | Primer sequences (5'-3')                          | Polymorphic |
|-------------|------------|---------------------------------------------------|-------------|
| Hind28      | 1          | GGTGTGCTACATCTCTTGGTTG<br>TCATCATGTCTCATGCAGCTTAC | No          |
| Eco23       | 2          | TATTTAGGTATGGCCGATTGTG<br>TGCCCAACTCTCTTCCATTTC   | No          |
| Pst19       | 3          | AACCTCGTGGAGTCTTTGTCC<br>CTGGATCATGGCTAGATGATTG   | Yes         |
| Hind8       | 3          | CTTGATGCTCTTTATGGGGAAG<br>TGTGCCAAGGTTATGGAGATG   | Yes         |
| Hind33      | 4          | AGTCACTCTGACACCTCAGTCG<br>CTTACTTGAAGACTCCCGTTTCG | Yes         |
| Hind10      | 4          | CGGTATGTCAATGCTCTCAATC<br>TTTCTCCACCTCTGGAACAAC   | No          |
| Hind34      | 5          | AGTCCTCCTCTCCGGGTATTTC<br>AGAGCAATGACCCTGTCCAC    | Yes         |
| Hind13      | 6          | GTGATCATGCAGAACTTGGTGT<br>CCGAGATGTGGAAGAAGAAGAT  | Yes         |
| Hind19      | 7 or 8     | GCCACTCTTCATTCTTCCCTCTG<br>TCAACGCCTTCTTCTTCTTCTC | Yes         |
| Hind25      | 7 or 11    | TCATAGTCTCGGCGTATGTCTC<br>ATGGGTTGGCTCTGTTTGTC    | No          |
| Hind11      | 10         | ATACGACATACAAGGAGGGTCTG<br>TGATTGACCTGCACAGAGAAAC | Yes         |
| Hind9       | 12         | GGATTTCGGCGTCTATACAGTC<br>TTGCTGATTCAAGTTGTTGCTC  | Yes         |
| Hind15      | 13         | GCTATGTGCCTACTGCTACTGG<br>CCGACTCTGCTTCTCATACTTG  | No          |

The restriction enzymes used were EcoRI (Eco), HindIII (Hind), or PstI (Pst). Polymorphic indicates whether or not there was a polymorphism between strains JEC20a and XL280p.

## Supplemental Figures

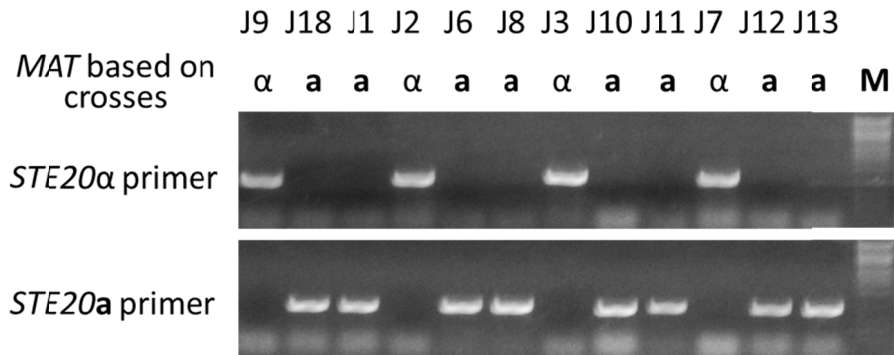

**SUPPLEMENTAL FIG 1** The mating type determined by crosses is the same as determined by amplification of the *MAT*-specific *STE20* gene. Progeny from the J generation were randomly selected (strain number indicated above). The mating type, based on crosses with reference strains JEC21 $\alpha$  and JEC20a, is indicated below their strain number. Gel images of PCR amplicons specific for *STE20 $\alpha$*  and *STE20a* of these strains are shown below.

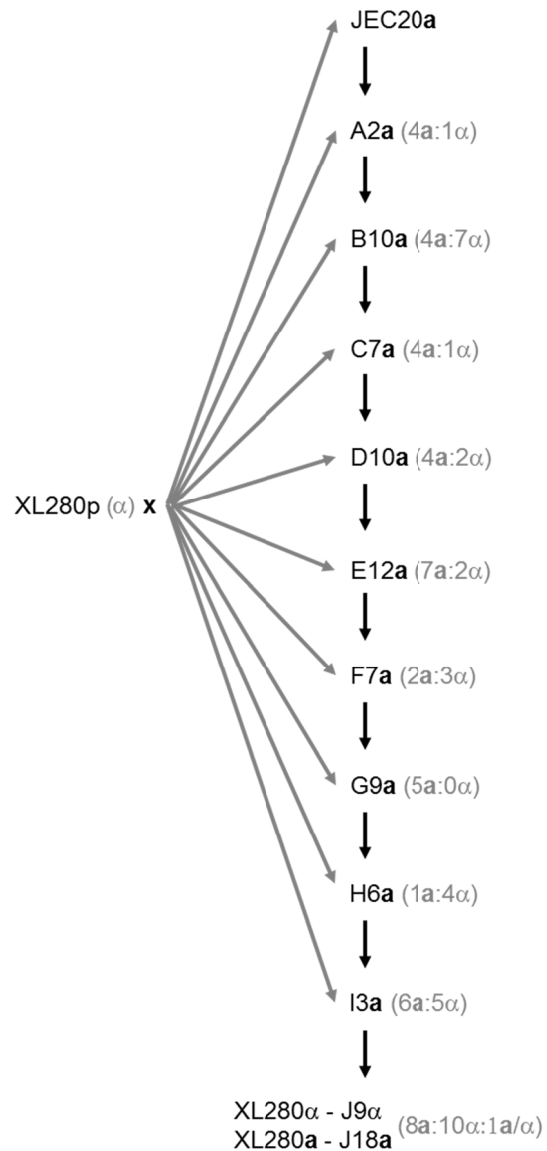

**SUPPLEMENTAL FIG 2** The pedigree of the congenic pair strains XL280 $\alpha$  and XL280a.

The progeny with the **a** mating type from a cross was selected at random and used for the next backcross with XL280p. The series of backcrosses gave rise to the congenic pair strains XL280 $\alpha$  and XL280a.

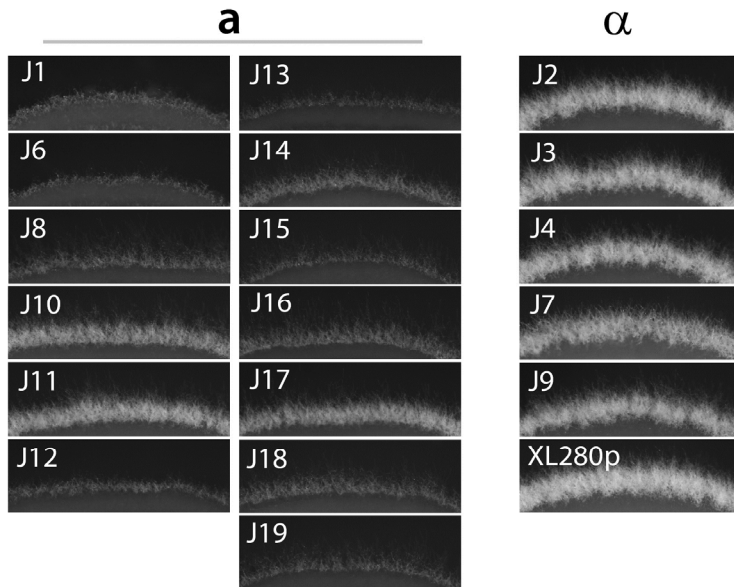

**SUPPLEMENTAL FIG 3** Enhanced self-filamentation is associated with the  $\alpha$  mating type locus. All progeny generated in the ten backcrosses (generation J) were examined for self-filamentation on V8 juice agar medium at 22°C in the dark. The parental XL280p strain was also cultured under the same condition for comparison. All the  $\alpha$  isolates examined produced filaments as robustly as the parental XL280p strain. By comparison, all the **a** isolates filamented relatively poorly, with strain to strain variations.

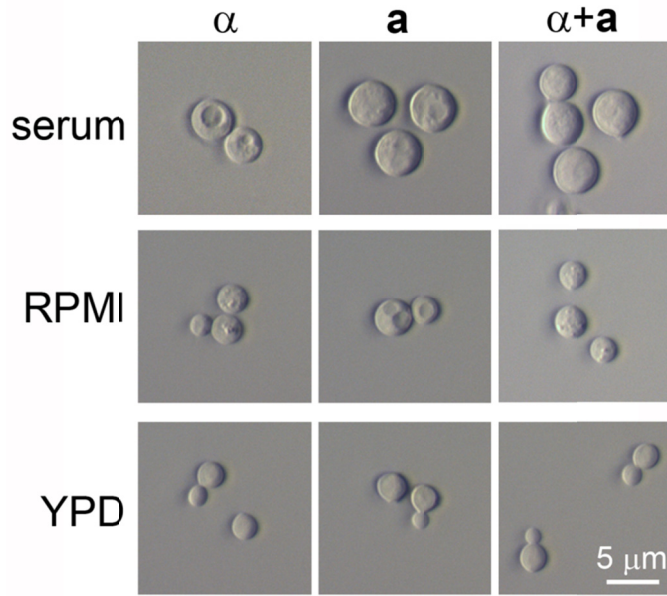

**SUPPLEMENTAL FIG 4** The congenic strains maintained yeast growth when cultured under *in vitro* conditions that are relevant to host physiology. Strains XL280 $\alpha$ , XL280**a**, and the mixture of equal number of XL280 $\alpha$  and XL280**a** were inoculated into fetal bovine serum, RPMI medium, or YPD medium with the final cell density of  $1 \times 10^5$  cells/ml. The cells were incubated at 37°C with 5% CO<sub>2</sub>. Photographs were taken after 3 days of incubation. All cells were in the yeast form and no filaments were observed.
